# Supplementary material for: Carbon signaling protein SbtB possesses redox-regulated apyrase activity to facilitate regulation of bicarbonate transporter SbtA
Source: bioRxiv or medRxiv preprint supplement (doi:10.1101/2022.05.18.492403), 2022-06-21
Supplement: Supplementary file [file media-1.pdf]

# Supplementary Materials for

## **Carbon signaling protein SbtB possesses redox-regulated apyrase activity to facilitate regulation of bicarbonate transporter SbtA**

Khaled A. Selim<sup>1,2,\*</sup>, Michael Haffner<sup>1</sup>, Reinhard Albrecht<sup>2</sup>, Hongbo Zhu<sup>2</sup>, Karl Forchhammer<sup>1</sup>,  
Marcus D. Hartmann<sup>2,3,\*</sup>

\*Corresponding authors: Khaled A. Selim: [khaled.selim@uni-tuebingen.de](mailto:khaled.selim@uni-tuebingen.de) and

M.D. Hartmann: [marcus.hartmann@tuebingen.mpg.de](mailto:marcus.hartmann@tuebingen.mpg.de)

<sup>1</sup> Interfaculty Institute for Microbiology and Infection Medicine, Organismic Interactions Department, Tübingen University, Auf der Morgenstelle 28, 72076 Tübingen, Germany

<sup>2</sup> Department of Protein Evolution, Max Planck Institute for Biology, Max-Planck-Ring 5, 72076 Tübingen, Germany

<sup>3</sup> Interfaculty Institute for Biochemistry, Tübingen University, Auf der Morgenstelle 34, 72076 Tübingen, Germany

### **This PDF file includes:**

Figs. S1 to S7

Tables. S1 to S2

|                            | N-terminal                                                                                                           | T-loop    |
|----------------------------|----------------------------------------------------------------------------------------------------------------------|-----------|
| <i>slr1513</i>             | MAKPAN <b>K</b> LVIVTEKILLKKIAKIIDES <b>GAKGY</b> TMNTG <b>GKGS</b> R----NVRSSGQNTSDI <b>E</b> 57                    |           |
| <i>all2133</i>             | MAKPA <b>K</b> LVIVTEKILLKKIANIIEES <b>GATGY</b> TVLETG <b>GKGS</b> R----NVRSTGQPNVSDI <b>Q</b> 57                   |           |
| <i>Ava_3028</i>            | MSKRAN <b>K</b> LVIVTEKVLKVKAKIIEE <b>GATGY</b> TVVDTG <b>GKGS</b> R----NVRSTGKPNSTDI <b>D</b> 57                    |           |
| <i>AM1_4165</i>            | MAKPA <b>K</b> LVIVTEKLLKKAQIIEE <b>GATGY</b> TVVDAG <b>GKGS</b> R----NVRSSGQPSVSDI <b>F</b> 57                      |           |
| <i>PCC8801_1248</i>        | MAKPA <b>K</b> LVIIITEKILLKKAQIIEE <b>GATGY</b> TVLETG <b>GKGS</b> R----NVRSSGQPNVSDI <b>Q</b> 57                    |           |
| <i>Cyan7425_5062</i>       | MAKPA <b>K</b> LVIVTEKILLKKIAKIIEES <b>GATGY</b> TVLETG <b>GKGS</b> R----NVRSSGQPSVSDI <b>Q</b> 57                   |           |
| <i>MAE62100</i>            | MAKPA <b>K</b> LVIVTEKILLKVKAKIIEEC <b>GASGY</b> TVMDTG <b>GKGS</b> R----NVRSSGQPHVSET <b>D</b> 57                   |           |
| <i>cce_2937</i>            | MTQKAS <b>K</b> LVIVTEKVLKVKAKIIDKA <b>GATGY</b> TVVAG <b>GKGS</b> R----GVRSSGQPSVNDI <b>F</b> 57                    |           |
| <i>PCC7424_1272</i>        | MTQKAS <b>K</b> LVIVTEKVLKVKAKIIEE <b>GATGY</b> TVVAG <b>GKGS</b> R----GVRSSGQPTVGD <b>F</b> 57                      |           |
| <i>NIES39_E03140</i>       | MTQKAS <b>K</b> LVIVTEKLLKKAQIIEE <b>GATGY</b> TVVDAG <b>GKGS</b> R----NVRSSGQPSVGD <b>I</b> 57                      |           |
| <i>SYNPCC7002_A0472</i>    | MTQQA <b>I</b> KLVIVTEKLLKKAQIIEE <b>GATGY</b> TVVPAG <b>GKGS</b> R----NVRSSGQPNVSDI <b>S</b> 57                     |           |
| <i>Synpcc7942_1476</i>     | MTQKAC <b>K</b> LIIIVTEKVLQNKITQIIDAA <b>GATGY</b> TVVSAG <b>GRGS</b> R----NVRSSGQPNVSDI <b>I</b> 57                 |           |
| <i>syc2462_d</i>           | MTQKAC <b>K</b> LIIIVTEKVLQNKITQIIDAA <b>GATGY</b> TVVSAG <b>GRGS</b> R----NVRSSGQPNVSDI <b>I</b> 57                 |           |
| <i>Synpcc7942_0321_PII</i> | ----MK <b>K</b> IEAIIIRPFKLDEVKIALVNAG <b>IVGM</b> TVSEVR <b>GFGRQK</b> QTE <b>RYR</b> GSEY <b>TV</b> VE <b>L</b> 56 |           |
|                            | * * * * *                                                                                                            | * * * * * |

|                            | B-loop                                                                                                                        | C-terminal (hairpin loop)<br>R-loop |
|----------------------------|-------------------------------------------------------------------------------------------------------------------------------|-------------------------------------|
| <i>slr1513</i>             | ANIK <b>F</b> EILTETREMAEEIADR-VAVKY <b>FNDY</b> -AGI <b>I</b> YICSA-EVLYGH <b>TF</b> <b>CGPEGC</b> -- 110                    |                                     |
| <i>all2133</i>             | ANIK <b>F</b> EVLTPDRDMAENIADQ-VAVKF <b>FLDF</b> -AGM <b>I</b> YICDA-EVLYGH <b>SF</b> <b>CGPDGC</b> -- 110                    |                                     |
| <i>Ava_3028</i>            | SNV <b>K</b> FVLTENREMAEKIADQ-VAIK <b>F</b> FDY-AGI <b>I</b> YICEA-EVLYGR <b>TF</b> <b>CGPDGC</b> -- 110                      |                                     |
| <i>AM1_4165</i>            | SNIK <b>I</b> EVLTTETREMAIQISDE-VAAQ <b>F</b> FDDY-SGI <b>A</b> IYLCDA-EVLSA <b>H</b> K <b>F</b> <b>CGPDGC</b> -- 110         |                                     |
| <i>PCC8801_1248</i>        | ANIK <b>F</b> EVLTPDRDMAENIADQ-VGVK <b>F</b> FLNY-AGM <b>I</b> YICDA-EVLYGH <b>SF</b> <b>CGPDGC</b> -- 110                    |                                     |
| <i>Cyan7425_5062</i>       | ANIK <b>F</b> EVLTPDRDMAENIADQ-VAVKF <b>FLDY</b> -AGI <b>I</b> YICDA-EVLYGH <b>SF</b> <b>CGPEGC</b> -- 110                    |                                     |
| <i>MAE62100</i>            | SNV <b>K</b> FELTPDRIMAQNI <b>A</b> KQ-VADQ <b>F</b> FLNF-AGM <b>I</b> YLCDA-EVLYG <b>Q</b> S <b>F</b> <b>CGPEGC</b> DI 112   |                                     |
| <i>cce_2937</i>            | TNV <b>K</b> FELTPNRDMAVNI <b>S</b> DE-VAAQ <b>F</b> FDDY-SGI <b>A</b> IYICDVMEVLHA <b>HT</b> F----- 105                      |                                     |
| <i>PCC7424_1272</i>        | SNV <b>K</b> FVLTTPNRDMAVKI <b>S</b> DL-VAAQ <b>F</b> FDDY-SGI <b>A</b> IYICDVMEVLHA <b>H</b> I <b>F</b> ----- 105            |                                     |
| <i>NIES39_E03140</i>       | SNV <b>K</b> FVLTTPNRDMAVKI <b>A</b> DE-VAAQ <b>F</b> FDDY-SGI <b>S</b> YVCDVMEVLHA <b>H</b> S <b>F</b> ----- 105             |                                     |
| <i>SYNPCC7002_A0472</i>    | SNV <b>K</b> I <b>E</b> VLTASREMALKI <b>S</b> DE-VAAQ <b>F</b> FDDY-SGI <b>T</b> YICDA-EVLYA <b>H</b> K <b>F</b> ----- 104    |                                     |
| <i>Synpcc7942_1476</i>     | SNIK <b>I</b> EVLTTIDRELALKI <b>A</b> DE-VAEQ <b>F</b> FDNY-SGI <b>S</b> YISDA-EVLHA <b>H</b> Q <b>F</b> ----- 104            |                                     |
| <i>syc2462_d</i>           | SNIK <b>I</b> EVLTTIDRELALKI <b>A</b> DE-VAEQ <b>F</b> FDNY-SGI <b>S</b> YISDA-EVLHA <b>H</b> Q <b>F</b> ----- 104            |                                     |
| <i>Synpcc7942_0321_PII</i> | QKL <b>K</b> LEIVVEDAQVDT <b>V</b> I-DKIVAA <b>A</b> RTGE <b>I</b> GD <b>G</b> KIFVSPVDQ <b>T</b> IR <b>I</b> RTGEKNADAI- 112 |                                     |
|                            | * * * * *                                                                                                                     |                                     |

42  
43 **Fig. S1. Multiple sequence alignment of SbtB homologs in cyanobacteria.** SbtB se-  
44 quences were extracted from CyanBase via a BLAST search using the protein sequences of  
45 *ScSbtB* and *NsSbtB* (encoded by *slr1513* and *all2133*, respectively) as query and aligned with  
46 canonical PII protein (encoded by *Synpcc7942\_0321\_PII*) using Clustal Omega. Residues  
47 highly conserved in canonical PII proteins are in red and indicated with asterisks. The T-loop

48 and B-loop of SbtB and PII proteins are highlighted in blue and green, respectively. In the C-  
49 terminal region, the PII arginine fingerprint motif (RxR), which is known to coordinate the  $\beta$ -  
50 and  $\gamma$ -phosphates of ATP or ADP, is highlighted in pink. The C-terminal hairpin loop in SbtB  
51 proteins, which forms a disulfide bond between Cys105 and Cys110 and therefore we termed  
52 R-loop (standing for redox-regulated loop), is highlighted in yellow.

53

54

55

56

57

58

59

60

61

62

63

64

65

66

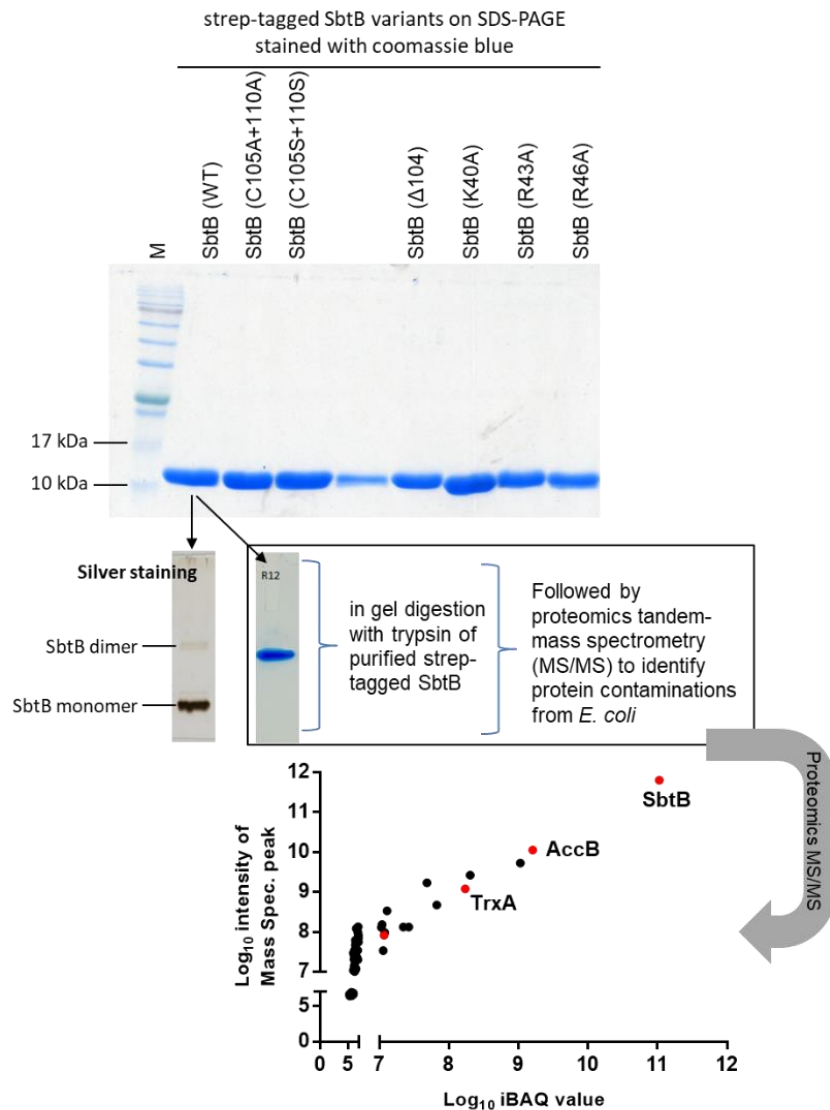

67  
 68 **Fig. S2. SDS-PAGE stained by Coomassie blue for strep-tagged SbtB variants used in**  
 69 **this study after purification from *E. coli* expressing the respective protein.** SDS-PAGE  
 70 showed high degree of purity for all purified SbtB variants. To check for residual protein con-  
 71 taminations from *E. coli*, the wildtype SbtB (WT) was further checked by silver staining, which  
 72 is more sensitive than Coomassie blue stain, and moreover it was subjected to tandem-mass  
 73 spectrometry (MS/MS) to identify the *E. coli* proteins, which coeluted with wildtype SbtB (check  
 74 proteomic dataset associated with this manuscript). The identified proteins were sorted based  
 75 on iBAQ values of significantly enriched proteins and plotted against the intensity of MS peaks  
 76 of the identified/defined peptides. The red dots refer to SbtB, thioredoxin-1 (TrxA), glu-  
 77 taredoxin-4 (GrxD), and biotin carboxyl carrier protein of acetyl-CoA carboxylase (AccB). Bio-  
 78 tinylated proteins (AccB) are common contaminant of strep-tag purifications. TrxA and GrxD  
 79 are of special interest as potential targets of SbtB to break the R-loop (check the main text).

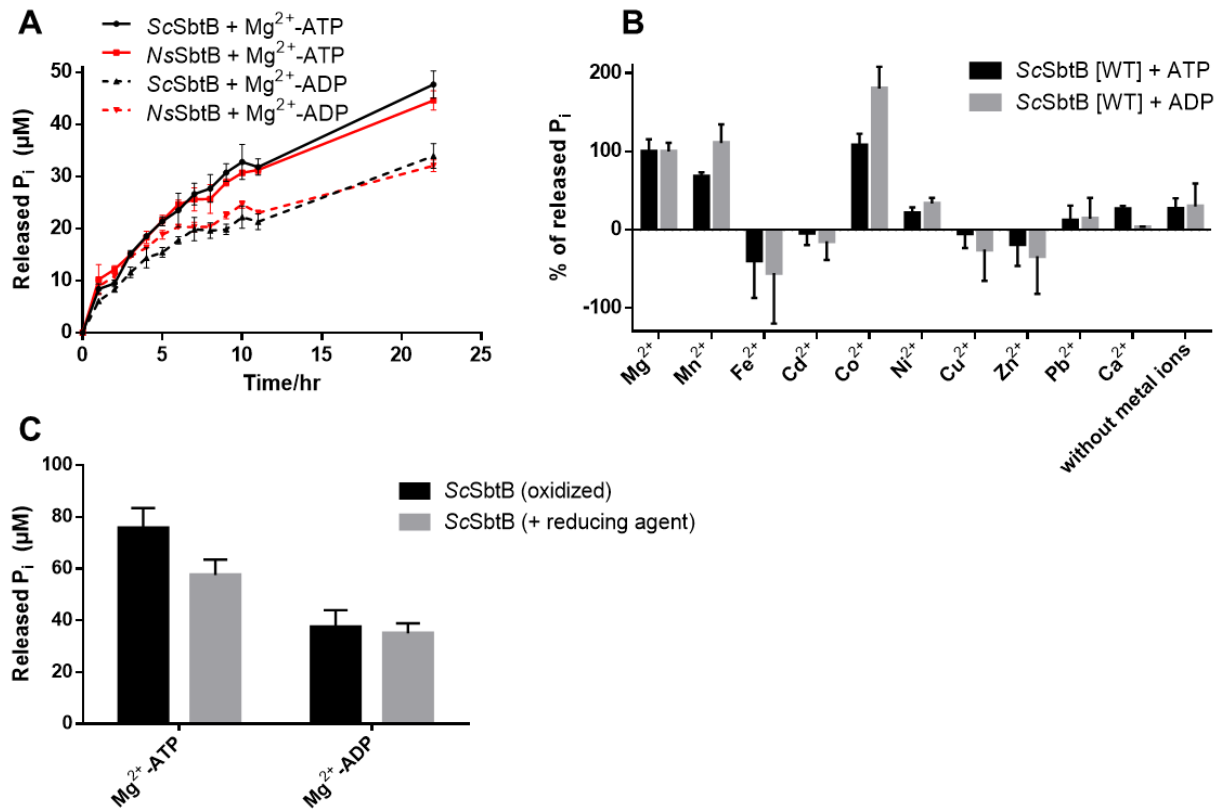

80

81 **Fig. S3. Apyrase activity of SbtB proteins via phosphate release assay.** (A) Time course  
 82 for slow ATP and ADP hydrolysis via ScSbtB and NsSbtB, revealing that ATP and ADP hy-  
 83 drolysis are a common trait among SbtB proteins. The released inorganic phosphate ( $P_i$ ) is  
 84 shown in  $\mu\text{M}$ . (B) Metal influence on ScSbtB apyrase activity, relative to wildtype ScSbtB-ac-  
 85 tivity in presence of  $\text{Mg}^{2+}$  (100%). The assay was performed in presence of 5 mM of the re-  
 86 spective metals. Negative values are indicative of heavily protein precipitation. The assay in-  
 87 dicated that  $\text{Mn}^{2+}$ ,  $\text{Mg}^{2+}$  and  $\text{Co}^{2+}$  could be used as metal ions by ScSbtB. The only metal which  
 88 can be found in excess inside cells is  $\text{Mg}^{2+}$ , and since high  $\text{Co}^{2+}$  concentrations is not of phys-  
 89 iological relevance, therefore we concluded that  $\text{Mg}^{2+}$  is most likely the metal used by ScSbtB.  
 90 (C) Influence of reducing agent on ScSbtB apyrase activity compared to ScSbtB under oxidiz-  
 91 ing conditions, showing that addition of 1 mM TECP does not influence on ScSbtB apyrase  
 92 activity.

ATP (short ATP soak,  $2.5\sigma$ )

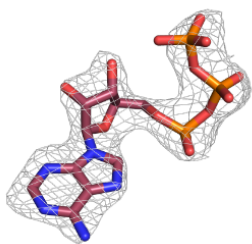

ADP (long ATP soak,  $2.5\sigma$ )

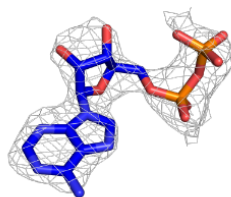

ADP (ADP soak,  $3.5\sigma$ )

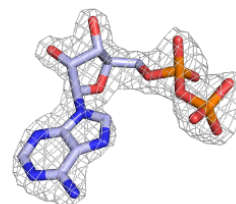

ATP (SbtB<sup>defC</sup>,  $3.5\sigma$ )

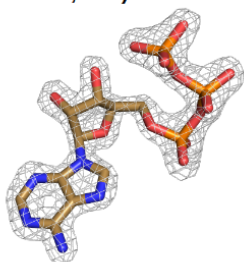

ADP (SbtB<sup>defC</sup>,  $3.5\sigma$ )

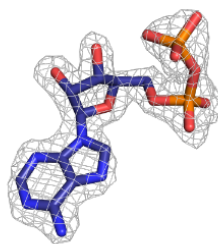

93

94 **Fig. S4. Electron densities of nucleotides.**

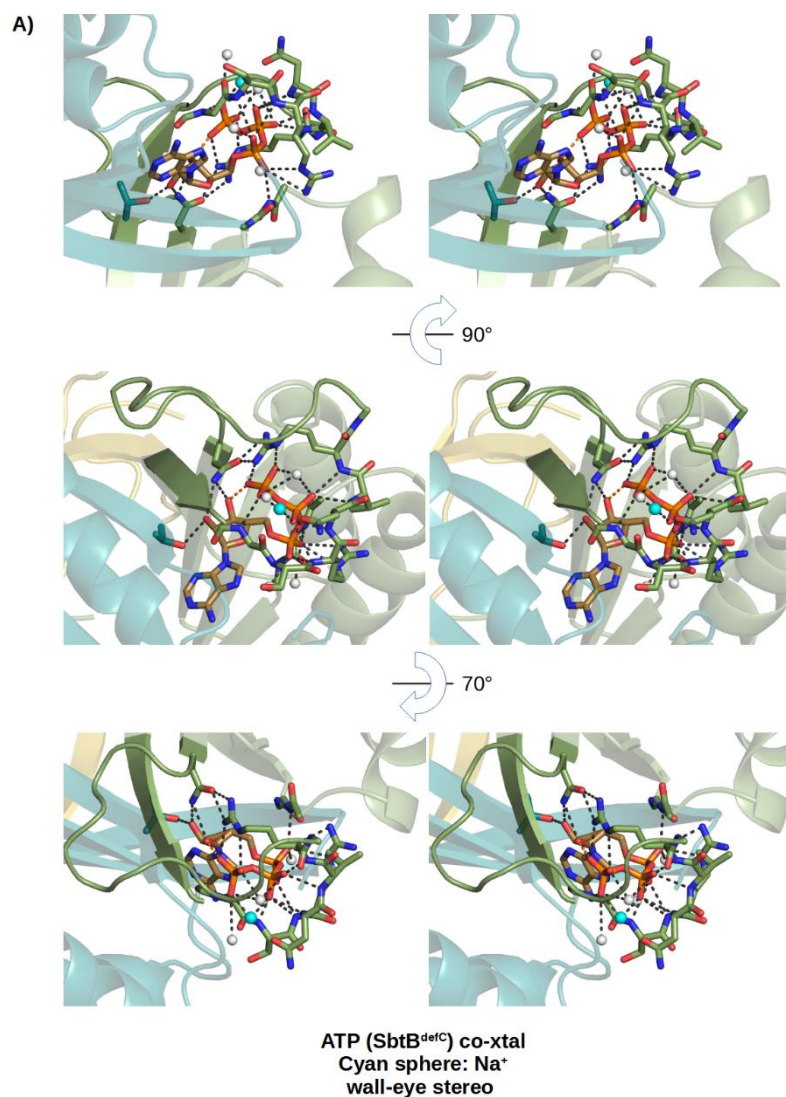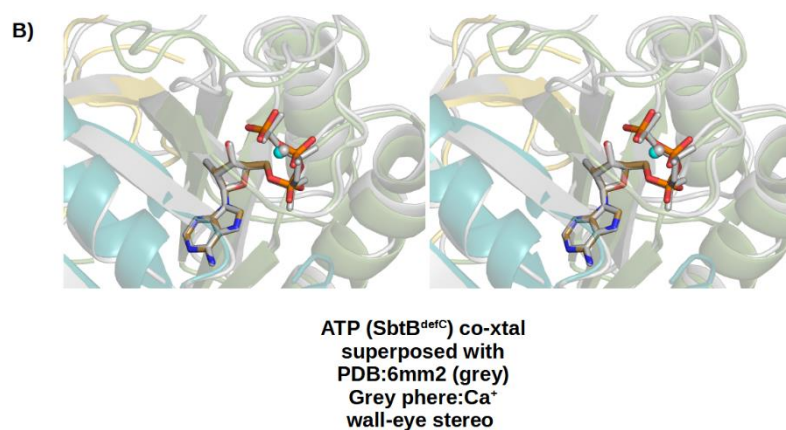

95

96 **Fig. S5. Stereo views of the SbtB<sup>defR</sup>:ATP complex.** A) The ATP binding mode is shown in  
 97 the same orientation as in (Fig. 3), plus two additional orientations, in stereo. B) Stereo super-  
 98 position of the SbtB<sup>defR</sup>:ATP complex to the SbtB:ATP complex from *Cyanobium* sp. PCC7001  
 99 (PDB: 6MM2).

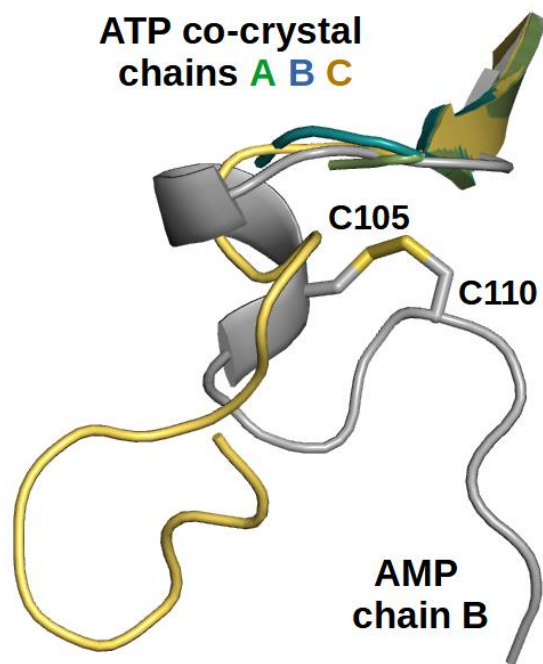

100

101

102 **Fig. S6. Comparison of folded and unfolded R-loop.** The R-loops of the three chains of the  
 103 SbtB<sup>defR</sup>:ATP co-crystal structure, in which the two R-loop cysteines were substituted by ala-  
 104 nine to mimick the reduced state, are superimposed to the oxidized R-loop in the SbtB:AMP  
 105 co-crystal structure. Obviously, the fold of the oxidized state is not assumed without the disul-  
 106 fide bond and the R-loop completely disordered in two of the three chains.



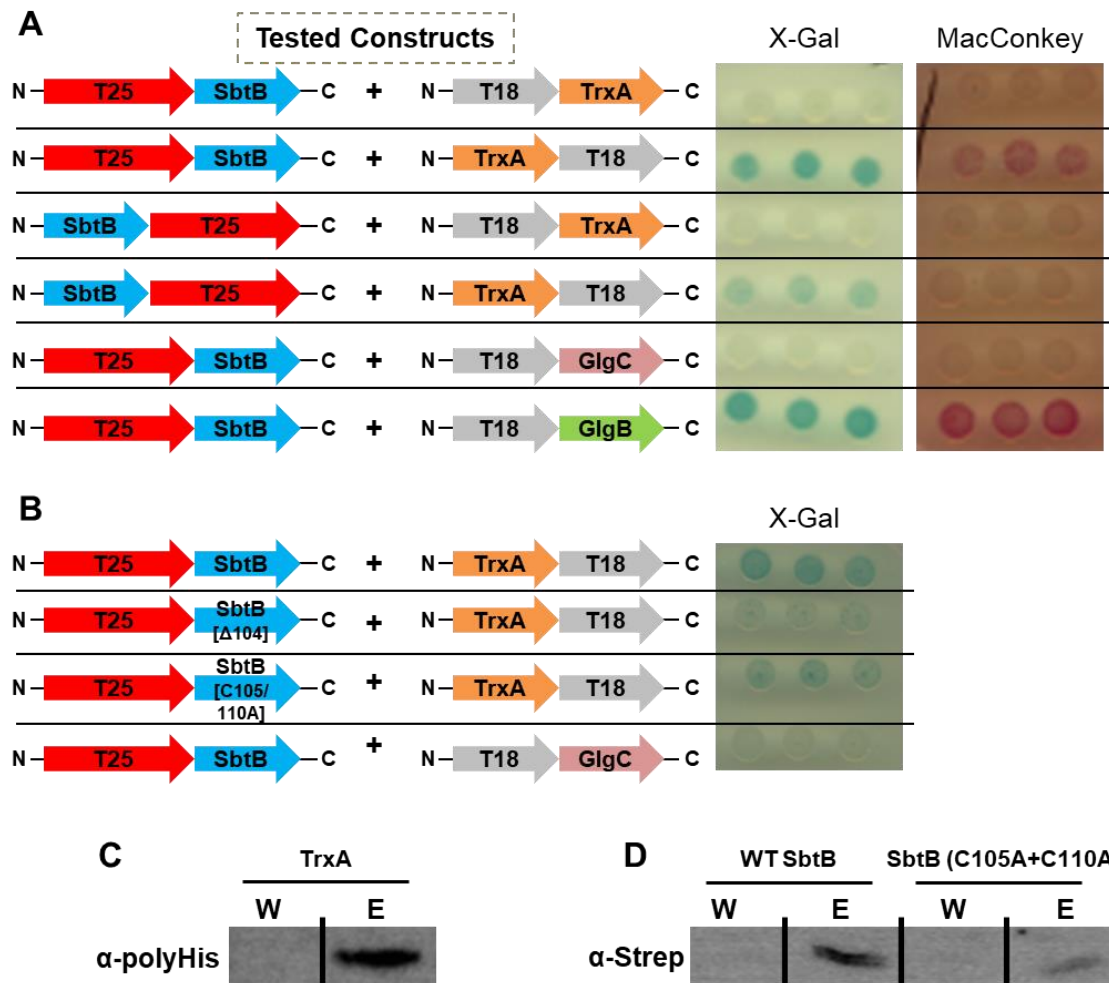

107  
108

109 **Fig. S7. Analysis of the interaction between SbtB and TrxA via bacterial two hybrid**  
 110 **assay (BACTH) and pull-down assays.** (A) The BACTH assay was performed using *E. coli*  
 111 cells expressing either N- or C-terminal fusion of Cya-T25 subunit to SbtB together with either  
 112 N- or C-terminal fusion of Cya-T18 subunit to TrxA, as indicated, on X-Gal or MacConkey  
 113 reporter plats. N-terminal fusion of Cya-T25 subunit to SbtB together with N-terminal fusion of  
 114 Cya-T18 subunit with either GlgB or GlgC, was used as positive and negative control,  
 115 respectively (13). (B) Influence of mutating SbtB R-loop residues on TrxA interaction. The  
 116 BACTH assay was performed using *E. coli* cells expressing N-terminal fusion of Cya-T18  
 117 subunit with TrxA together with N-terminal fusion of Cya-T28 subunit of either wildtype SbtB,  
 118 or SbtB(Δ104), or SbtB(C105A+C110A) as indicated, on X-Gal reporter plat. Positive  
 119 interaction is evidenced by appearance of a blue or red color on X-Gal or MacConkey reporter  
 120 plates, respectively. The assay was done using 3-independent/freshly transformed *E. coli* cells,  
 121 for at least three times to ensure reproducibility. (C and D) Immunoblot blot analysis of SbtB  
 122 and TrxA interaction in last wash (W) and elution (M) fractions. (C) Strep-tagged SbtB was  
 123 immobilized and the coelution of TrxA was checked using α-polyHis antibody. (D) His-tagged  
 124 TrxA was immobilized on Ni<sup>2+</sup>-NTA and the coelution of wildtype SbtB or its variant  
 125 (C105A+C110A) was checked using α-strep antibody.

126 **Table S1. Primers and Plasmids**

| Primers/<br>amplification                                                                           | Sequence (5'→3')                                                                                                   | Note/<br>Ref.        |
|-----------------------------------------------------------------------------------------------------|--------------------------------------------------------------------------------------------------------------------|----------------------|
| <b>Recombinant proteins</b>                                                                         |                                                                                                                    |                      |
| C-terminal StrepII-tagged ScSbtB ( <i>slr1513</i> ); (pASK-IBA3_ScSbtB-strep plasmid)               | 1256_Fw:<br>GTGAAATGAATAGTTCGACAAAAATCTAGATAACGAGGGCAAAAAATG<br>GCTAAACCAGCGAACAAGCTCG                             | (Selim et al. 2018)  |
|                                                                                                     | 1257_Rv:<br>AAGCTTATTATTTTCGAACTGCGGGTGGCTCCAAGCGCTACAGCCCT<br>CAGGGCCACAGAAAG                                     | (Selim et al. 2018)  |
| C-terminal StrepII-tagged NsSbtB ( <i>all2133</i> ); (pASK-IBA3_NsSbtB-strep plasmid)               | 1664_Fw_all2133_CT strep:<br>GTGAAATGAATAGTTCGACAAAAATCTAGATAACGAGGGCAAAAAATG<br>GCCCAAGCCAGCCAAAAAG               | (Selim et al. 2021a) |
|                                                                                                     | 1665_Rv_all2133_CT strep:<br>CAAGCTTATTATTTTCGAACTGCGGGTGGCTCCAAGCGCTACAGCCGCTGGTCCGC                              | (Selim et al. 2021a) |
| C-terminal StrepII-tagged ScSbtB-Δ104 (pASK-IBA3_ScSbtB-Δ104)                                       | 1256_Fw:<br>GTGAAATGAATAGTTCGACAAAAATCTAGATAACGAGGGCAAAAAATG<br>GCTAAACCAGCGAACAAGCTCG                             | This study           |
|                                                                                                     | 1663_Rv_SbtB delta 104:<br>CAAGCTTATTATTTTCGAACTGCGGGTGGCTCCAAGCGCTGAAAGTATGCCATAAAGTACTTCTGC                      | This study           |
| C-terminal StrepII-tagged ScSbtB-C105S+C110S (pASK-IBA3_ScSbtB-C105S+C110S)                         | 1256_Fw:<br>GTGAAATGAATAGTTCGACAAAAATCTAGATAACGAGGGCAAAAAATG<br>GCTAAACCAGCGAACAAGCTCG                             | This study           |
|                                                                                                     | 1761_Rv_SbtB-C105+110S<br>CAAGCTTATTATTTTCGAACTGCGGGTGGCTCCAAGCGCTGAAAGTATGCCATAAAGTACTTCTGC                       | This study           |
| C-terminal StrepII-tagged ScSbtB-C105A+C110A (pASK-IBA3_ScSbtB-C105A+C110A)                         | 1256_Fw:<br>GTGAAATGAATAGTTCGACAAAAATCTAGATAACGAGGGCAAAAAATG<br>GCTAAACCAGCGAACAAGCTCG                             | This study           |
|                                                                                                     | 1759_Rv_SbtB-C105+110A<br>CAAGCTTATTATTTTCGAACTGCGGGTGGCTCCAAGCGCTT-<br>GCGCCCTCAGGGCTGCGAAAGTATGCCATAAAGTACTTCTGC | This study           |
| C-terminal StrepII-tagged ScSbtB-R46A (pASK-IBA3_ScSbtB-R46A)                                       | 1855_Fw_R46A_SbtB:<br>AATACCGGTGGCAAGGGTAGCCGTAACGTGGCTCGTGGGTCAAC                                                 | This study           |
|                                                                                                     | 1856_Rv_K40,R43,R46:A_SbtB:<br>CATTACCGTGATCCTTTGGCACCGGATTCCG                                                     | This study           |
| C-terminal StrepII-tagged ScSbtB-R43A (pASK-IBA3_ScSbtB-R43A)                                       | 1854_Fw_R43A_SbtB:<br>AATACCGGTGGCAAGGGTAGCCCAACGTGGCTCG                                                           | This study           |
|                                                                                                     | 1856_Rv_K40,R43,R46:A_SbtB:<br>CATTACCGTGATCCTTTGGCACCGGATTCCG                                                     | This study           |
| C-terminal StrepII-tagged ScSbtB-K40A (pASK-IBA3_ScSbtB-K40A)                                       | 1853_Fw_K40A_SbtB:<br>AATACCGGTGGCTGGTAGCCGTAAC                                                                    | This study           |
|                                                                                                     | 1856_Rv_K40,R43,R46:A_SbtB:<br>CATTACCGTGATCCTTTGGCACCGGATTCCG                                                     | This study           |
| N-terminal His <sub>6</sub> -tagged TrxA ( <i>slr0623</i> ); (pET15b_TrxA-His <sub>6</sub> plasmid) | pET15b_slr0623_fw:<br>CAGCAGCGGCTGGTCCGCGCGGCAGCCATATGCTCGAGATGAGTGCTACCCCTCAAGTTTC                                | This study           |
|                                                                                                     | pET15b_slr0623_rev:<br>CCCTCAAGACCCGTTTAGAGGCCCAAGGGGTTATGCTAGTTATTGCTCAGCGGTGGCAG-<br>CAGCCAAC                    | This study           |

| BACTH constructs                                                                              |                                                                                                |                      |
|-----------------------------------------------------------------------------------------------|------------------------------------------------------------------------------------------------|----------------------|
| SbtB-N-terminally tagged with T25 subunit of Cya (pKT25_SbtB_N plasmid)                       | pKT25_sbtb_fw:<br>CGATTACCTGGCGCGCACGCGGGGGCTGCAGGGTCGACTATGGCTAAACCAGCGAACAAG                 | (Selim et al. 2021a) |
|                                                                                               | pKT25_sbtb_rev:<br>GGCCGAATTCTTAGTACTTAGTACCCGGGGATCCTCTAGTTAACAGCCCTCAGGGCCAC                 | (Selim et al. 2021a) |
| SbtB-C-terminally tagged with T25 subunit of Cya (pKT25_SbtB_C plasmid)                       | Fw: GAATTGTGAGCGGATAACAATTTACACAGGAAACAGCTATGATGGCTAAACCAGCGAAC                                | This study           |
|                                                                                               | Rv: CGGCGTTTGCCTAACCGCTGATGCGATTGCTGCATGGTACAGCCCTCAGGGCCACAGAAAG                              | This study           |
| SbtB-N-terminally tagged with T25 subunit of Cya (pKT25_SbtB_[C10 5A+C110A] plasmid)          | Fw:<br>TTCGGTGACCGATTACCTGGCGCGCACGCGGGGGCTGCAGCTAAACCAGCGAACAAGCTC                            | This study           |
|                                                                                               | Rv:<br>ACGACGGCCGAATTCTTAGTACTTAGGTACCCGGGGATCTTATGCGCCCTCAGGGCCTGC                            | This study           |
| SbtB-N-terminally tagged with T25 subunit of Cya (pKT25_SbtB_[Δ10 4] plasmid)                 | Fw:<br>TTCGGTGACCGATTACCTGGCGCGCACGCGGGGGCTGCAGCTAAACCAGCGAACAAGCTC                            | This study           |
|                                                                                               | Rv:<br>ACGACGGCCGAATTCTTAGTACTTAGGTACCCGGGGATCTTAGAAAGTATGCCATAAAGT                            | This study           |
| TrxA-N-terminally tagged with T18 subunit of Cya ( <i>slr0623_N</i> ); (pUT18_TrxA_N plasmid) | Fw:<br>GCGGCGGCCGTCGCTGGGCGCAGTGGAACGCCACTGCAGGAGTGCTACCCCTCAAGTTTC                            | This study           |
|                                                                                               | Rv:<br>TTAGTTATATCGATGAATTCGAGCTCGGTACCCGGGGATCTTAAAGA-TATTTTCTAGGGTGCTGG                      | This study           |
| TrxA-C-terminally tagged with T18 subunit of Cya ( <i>slr0623_C</i> ); (pUT18_TrxA_C plasmid) | Fw:<br>CAATTTACACAGGAAACAGCTATGACCATGATTACGCCAATGAGTGCTACCCCTCAAGT                             | This study           |
|                                                                                               | Rv:<br>CTGAATTCGAGCTCGGTACCCGGGGATCCTCTAGAGTCGAAAGATATTTTCTAGGGTGCTGGC                         | This study           |
| GlgB-N-terminally tagged with T18 subunit of Cya ( <i>slf0158_N</i> ); (pUT18_GlgB_N plasmid) | pUT18 glgB slf0158 fw<br>GACCATGATTACGCCAAGCTTGCATGCCTGCAGGTCGACTATGACCTACCCATCAACG            | (Selim et al. 2021a) |
|                                                                                               | pUT18 glgB slf0158 rev<br>CCTCGTGGCGGCTGAATTCGAGCTCGGTACCCGGGGATCAGCTATGTTGCTAGCCTCTTC         | (Selim et al. 2021a) |
| GlgB-C-terminally tagged with T18 subunit of Cya ( <i>slf0158_C</i> ); (pUT18_GlgB_C plasmid) | pUT18c glgB slf0158 fw<br>GCCGTCGCTGGGCGCAGTGGAACGCCACTGCAGGTCGACTATGACCTACCCATCAACG           | (Selim et al. 2021a) |
|                                                                                               | pUT18c glgB slf0158 rev<br>TTAGTTATATCGATGAATTCGAGCTCGGTACCCGGGGATCAGCTATGTTGCTAGCCTCTTC       | (Selim et al. 2021a) |
| GlgC-C-terminally tagged with T18 subunit of Cya ( <i>slr1176_C</i> ); (pUT18_GlgC_C plasmid) | pUT18 glgC AGP slr1176 fw:<br>GACCATGATTACGCCAAGCTTGCATGCCTGCAGGTCGACTGTGTGTTGTTGGCAATCGAG     | This study           |
|                                                                                               | pUT18 glgC AGP slr1176 rev:<br>CCTCGCTGGCGGCTGAATTCGAGCTCGGTACCCGGGGATCGATTACCGTGCCGTCGGCGATC  | This study           |
| GlgC-N-terminally tagged with T18 subunit of Cya ( <i>slr1176_N</i> ); (pUT18_GlgC_N plasmid) | pUT18c glgC AGP slr1176 fw:<br>GCCGTCGCTGGGCGCAGTGGAACGCCACTGCAGGTCGACTGTGTGTTGTTGGCAATCGAG    | This study           |
|                                                                                               | pUT18c glgC AGP slr1176 rev:<br>TTAGTTATATCGATGAATTCGAGCTCGGTACCCGGGGATCGATTACCGTGCCGTCGGCGATC | This study           |

128  
129

**Table S2. Data Collection and Refinement Statistics**

| Structure                                  | SbtB, short ATP soak         | SbtB, long ATP soak          | SbtB, ADP soak               | SbtB C105A+C110A variant, ATP co-crystal | SbtB ( $\Delta$ 104) variant, ADP co-crystal |
|--------------------------------------------|------------------------------|------------------------------|------------------------------|------------------------------------------|----------------------------------------------|
| PDB code                                   | <b>7R2Y</b>                  | <b>7R2Z</b>                  | <b>7R30</b>                  | <b>7R31</b>                              | <b>7R32</b>                                  |
| <b>Data collection</b>                     |                              |                              |                              |                                          |                                              |
| Space group                                | P3 <sub>2</sub>              | P3 <sub>2</sub>              | P3 <sub>2</sub>              | P4 <sub>1</sub>                          | P4 <sub>1</sub>                              |
| Cell parameters                            | a = b = 63.83 Å, c = 81.23 Å | a = b = 60.80 Å, c = 78.44 Å | a = b = 63.64 Å, c = 82.21 Å | a = b = 73.19 Å, c = 89.01 Å             | a = b = 73.98 Å, c = 88.42 Å                 |
| Wavelength (Å)                             | 1.000                        | 1.000                        | 1.000                        | 1.000                                    | 1.000                                        |
| Resolution limits (Å) <sup>a</sup>         | 32.73-2.15 (2.25-2.15)       | 31.45-2.40 (2.54-2.40)       | 32.95-1.90 (2.01-1.90)       | 33.85-1.52 (1.61-1.52)                   | 56.74-1.75 (1.85-1.75)                       |
| Unique reflections                         | 20143 (3177)                 | 12684 (2032)                 | 29447 (4769)                 | 71568 (11257)                            | 47404 (7186)                                 |
| Completeness (%)                           | 99.6 (97.6)                  | 99.8 (98.8)                  | 100 (100)                    | 98.8 (96.8)                              | 98.8 (97.7)                                  |
| Redundancy                                 | 10.2 (9.51)                  | 7.23 (6.79)                  | 10.3 (10.3)                  | 11.9 (8.11)                              | 9.89 (10.1)                                  |
| I/ $\sigma$ I                              | 27.0 (1.70)                  | 20.8 (2.28)                  | 20.5 (1.58)                  | 24.4 (1.73)                              | 17.0 (2.03)                                  |
| R <sub>merge</sub> (%)                     | 4.4 (139.5)                  | 5.8 (78.4)                   | 5.8 (153.7)                  | 5.4 (109.4)                              | 8.5 (142.2)                                  |
| CC(1/2)                                    | 100 (75.1)                   | 99.9 (86.3)                  | 99.9 (71.3)                  | 99.9 (93.2)                              | 99.9 (74.2)                                  |
| <b>Refinement</b>                          |                              |                              |                              |                                          |                                              |
| Resolution limits (Å)                      | 32.73-2.15 (2.20-2.15)       | 31.45-2.40 (2.46-2.40)       | 32.95-1.90 (1.95-1.90)       | 33.85-1.52 (1.56-1.52)                   | 56.74-1.75 (1.80-1.75)                       |
| R <sub>cryst</sub> (%)                     | 18.0 (36.6)                  | 18.6 (45.4)                  | 17.1 (36.1)                  | 18.8 (39.1)                              | 18.6 (35.8)                                  |
| R <sub>free</sub> (%)                      | 21.2 (43.9)                  | 21.6 (47.7)                  | 19.5 (34.2)                  | 20.6 (36.9)                              | 20.9 (37.8)                                  |
| Protein molecules / asymmetric unit        | 3                            | 3                            | 3                            | 3                                        | 3                                            |
| Mean B value (Å <sup>2</sup> )             | 70.2                         | 66.2                         | 51.0                         | 28.1                                     | 33.2                                         |
| <b>Ramachandran Statistics<sup>b</sup></b> |                              |                              |                              |                                          |                                              |
| Core regions (%)                           | 93.5                         | 93.3                         | 94.9                         | 96.2                                     | 95.8                                         |
| Allowed regions (%)                        | 99.2                         | 99.6                         | 100                          | 100                                      | 99.6                                         |

130

131 <sup>a</sup> Values in parenthesis refer to the highest-resolution shell.

132 <sup>b</sup> Ramachandran statistics were determined with PROCHECK.
